# Supplementary material for: Forging a link between mentoring and collaboration: a new training model for implementation science
Source: PubMed Central journal article supplement (PMC5062835; doi:10.1186/s13012-016-0499-y), 2016-10-13
Supplement: 13012_2016_499_MOESM1_ESM.pdf [file 13012_2016_499_MOESM1_ESM.pdf]

# IRI Network Data Codebook

---

## Networks

### Contact

| Network | Links            | Direction    |
|---------|------------------|--------------|
| Contact | Valued (average) | Non-directed |

| Value | Label   |
|-------|---------|
| 1     | Yearly  |
| 2     | Monthly |
| 3     | Weekly  |

### Collaboration

| Network         | Links                     | Direction    |
|-----------------|---------------------------|--------------|
| NewResearch     | Dichotomous               | Non-directed |
| Grant           | Dichotomous               | Non-directed |
| PresentResearch | Dichotomous               | Non-directed |
| PublishPaper    | Dichotomous               | Non-directed |
| Any             | Valued – sum of the above | Non-directed |

### Mentor

| Network | Links       | Direction |
|---------|-------------|-----------|
| Mentor  | Dichotomous | Directed  |

## Attributes

| Variable   | Label                                                                                                                  |
|------------|------------------------------------------------------------------------------------------------------------------------|
| NodeID     | Vertex number in .net file                                                                                             |
| Label      | Vertex label in .net file                                                                                              |
| Role       | IRI member role<br>1 = Fellow<br>2 = Core Faculty<br>3 = Expert Faculty                                                |
| Discipline | Broad scientific discipline<br>1 = Allied Health<br>2 = Clinical/Medicine<br>3 = Social Science/Statistics/Methodology |
